# Supplementary material for: Endothelial Cell Activation by SARS-CoV-2 Spike S1 Protein: A Crosstalk between Endothelium and Innate Immune Cells
Source: MDPI journal article supplement (doi:10.3390/biomedicines9091220), 2021-09-14
Supplement: s1 [file s1]

# Endothelial Cell Activation by SARS-CoV-2 Spike S1 Protein: A Crosstalk between Endothelium and Innate Immune Cells

## Supplementary Files

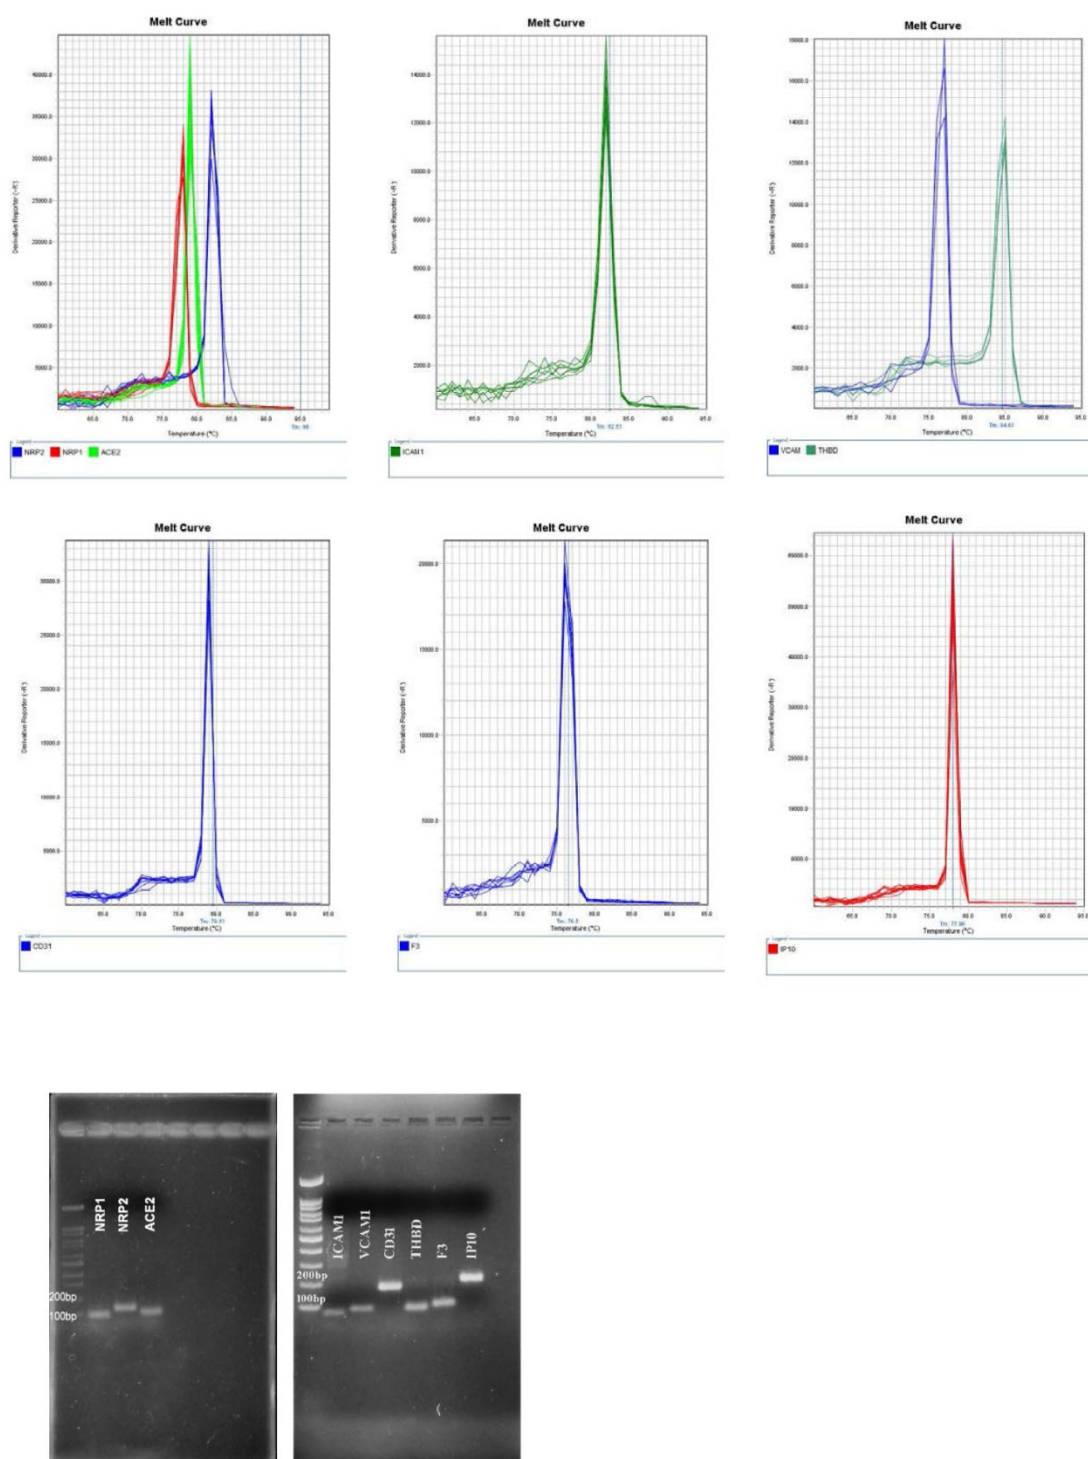

**Figure S1.** Specificity of the primer pairs employed for monitoring gene expression.
